# Supplementary material for: sympl (v. 0.4.0) and climt (v. 0.15.3) – towards a flexible framework for building model hierarchies in Python
Source: Copernicus journal article supplement (doi:10.5194/gmd-11-3781-2018), 2018-09-18
Supplement: Supplementary file 1 [file gmd-11-3781-2018-supplement.zip]

Archive with 3 entries (3 files):
- gmd_radiative_convective.py
- gmd_aquaplanet.py
- gmd-11-3781-2018-supplement-title-page.pdf
