# Supplementary material for: sympl (v. 0.4.0) and climt (v. 0.15.3) – towards a flexible framework for building model hierarchies in Python
Source: Copernicus journal article supplement (doi:10.5194/gmd-11-3781-2018), 2018-09-18
Supplement: Supplementary file 1 [file gmd-11-3781-2018-supplement.zip › gmd-11-3781-2018-supplement-title-page.pdf]

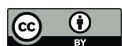

## *Supplement of*

# **sympl (v. 0.4.0) and climt (v. 0.15.3) – towards a flexible framework for building model hierarchies in Python**

**Joy Merwin Monteiro et al.**

*Correspondence to:* Joy Merwin Monteiro ([joy.merwin@gmail.com](mailto:joy.merwin@gmail.com))

- [gmd-11-3781-2018-supplement-title-page.pdf](#)
- [gmd\\_aquaplanet.py](#)
- [gmd\\_radiative\\_convective.py](#)

The copyright of individual parts of the supplement might differ from the CC BY 4.0 License.
